# Supplementary material for: Changes in the Microbial Community in Soybean Plots Treated with Biochar and Poultry Litter
Source: MDPI journal article supplement (doi:10.3390/agronomy11071428), 2021-07-17

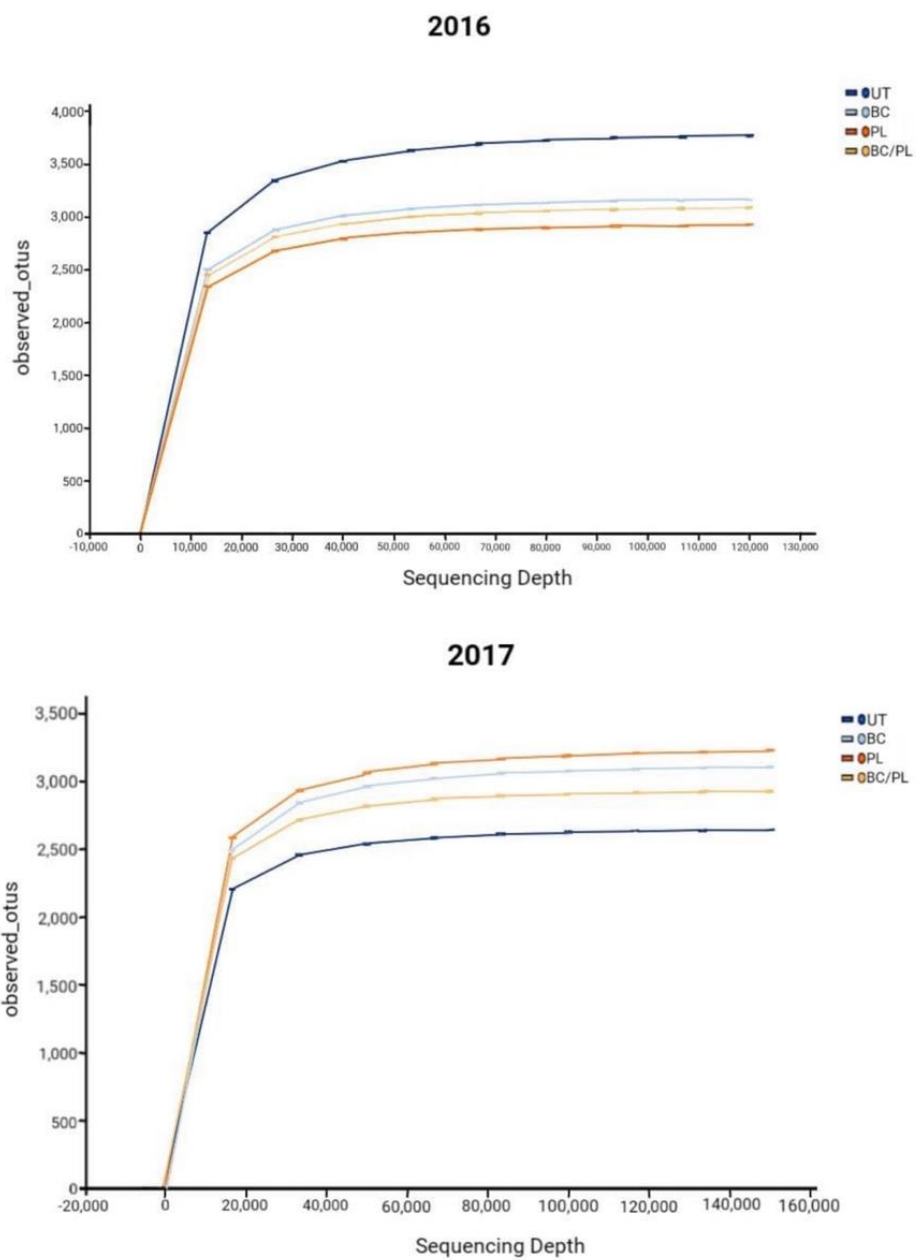

**Figure S1.** Rarefaction plots on the observed ASVs of the different soil treatments at different sampling depths.

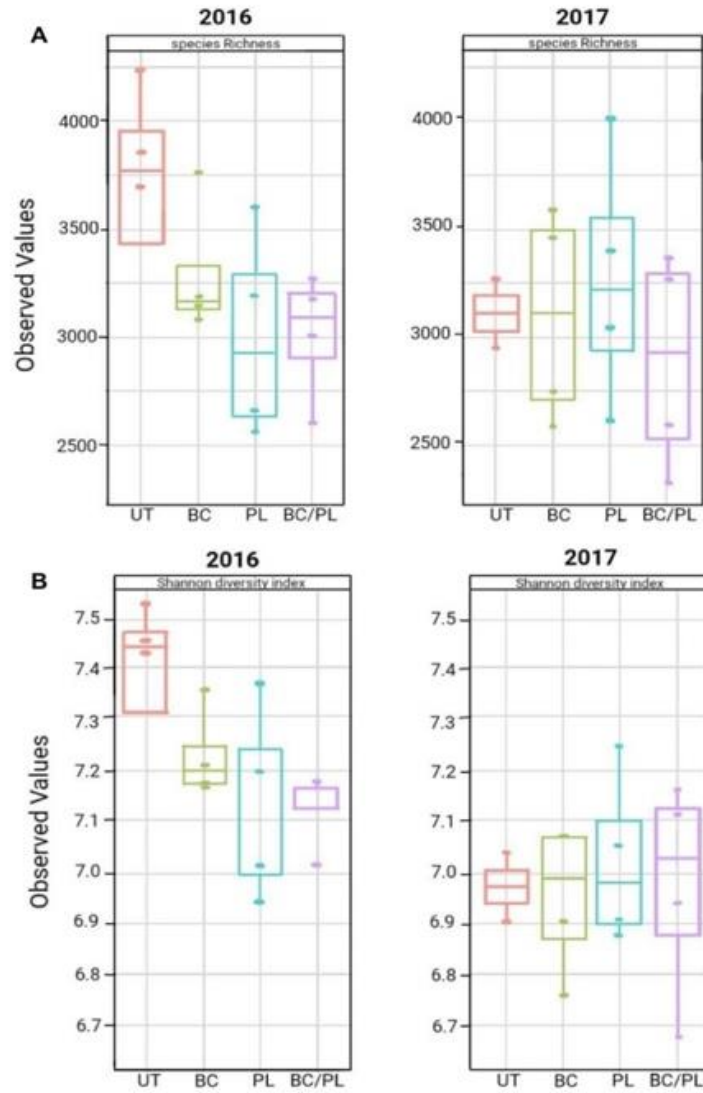

**Figure S2.** Box plots of the alpha diversity patterns for the soil samples showing the richness (A) and diversity (B).

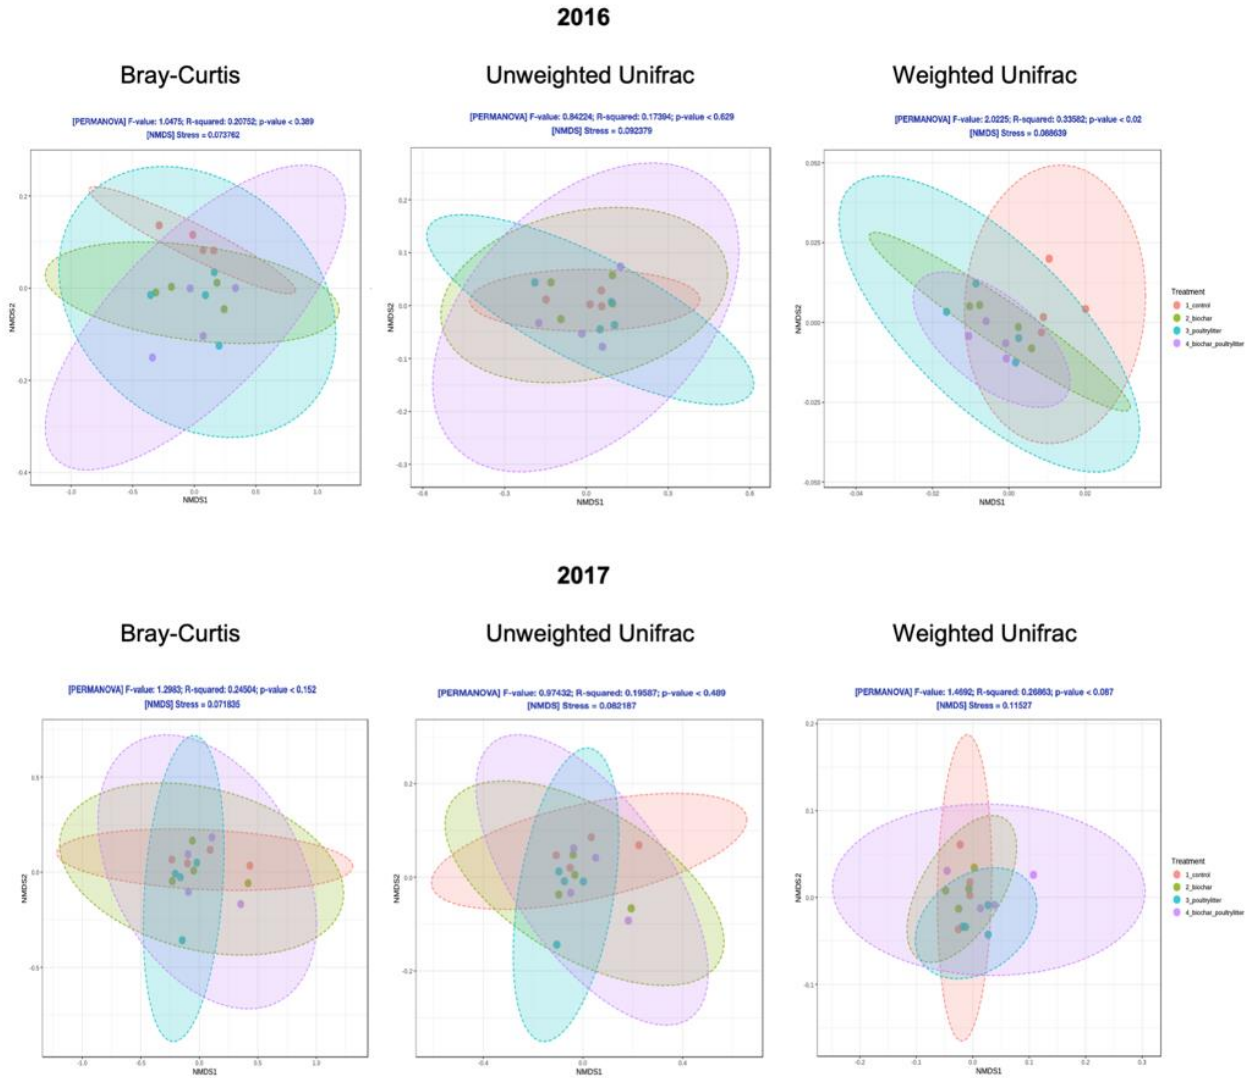

**Figure S3.** The beta diversity among soil treatments in 2016 and 2017 depicted in non-metric multidimensional scaling (NMDS) plots with Bray–Curtis dissimilarity distances, unweighted unifrac, and weighted unifrac distance measures among soil treatments: untreated (UT), biochar (BC), poultry litter (PL), and a combination of biochar and poultry litter (BC/PL).

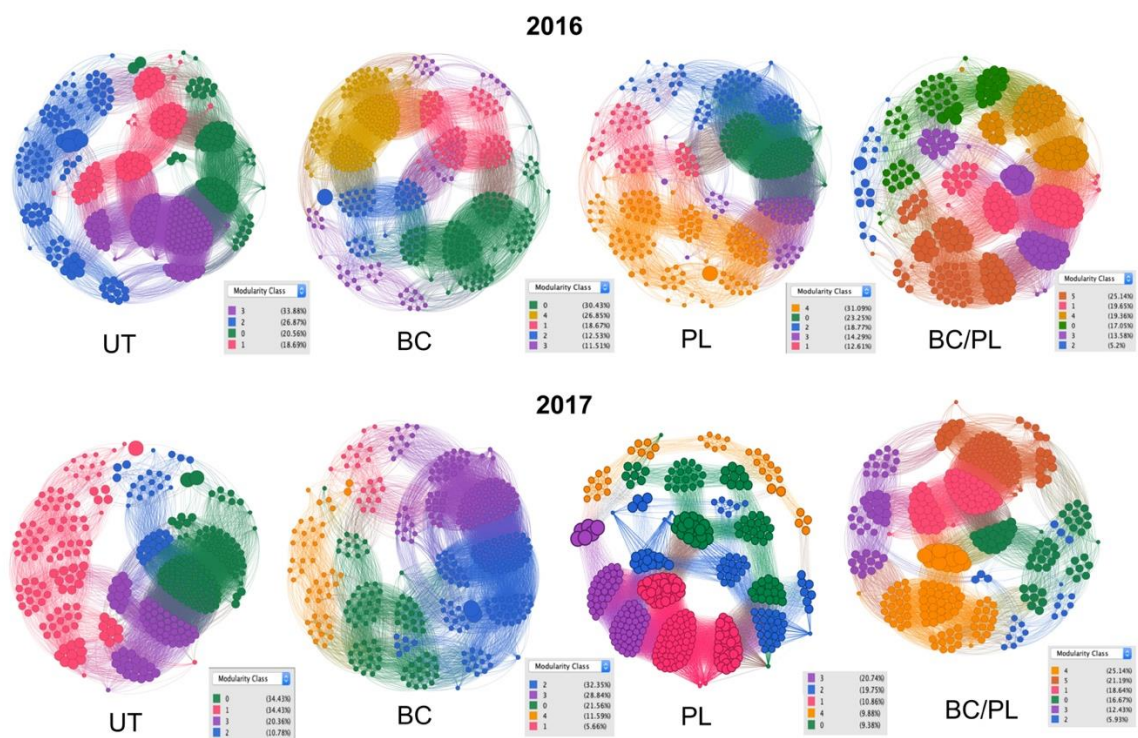

Supplement: s1 [file s1]
